# Supplementary material
Source: PubMed Central journal article supplement (PMC4618379)

**A**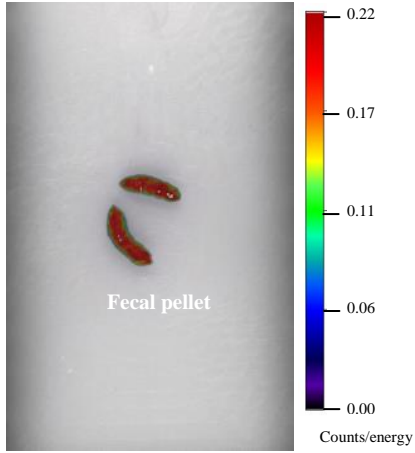**B**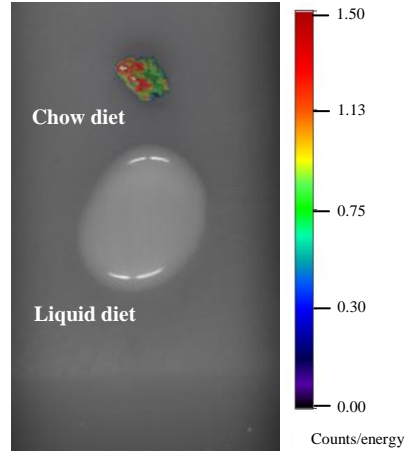**C**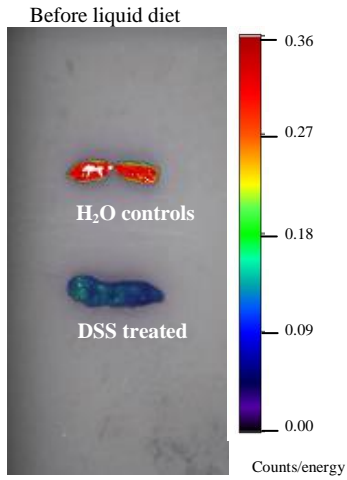**D**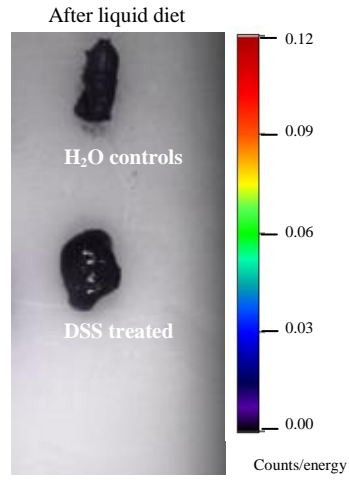**E**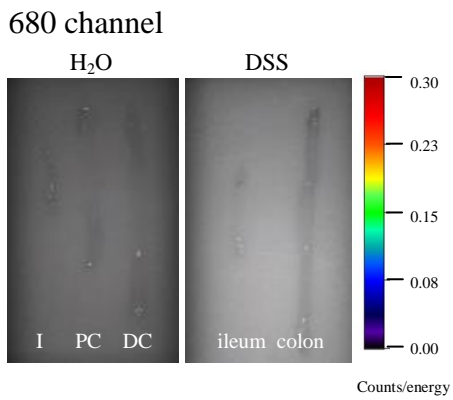**F**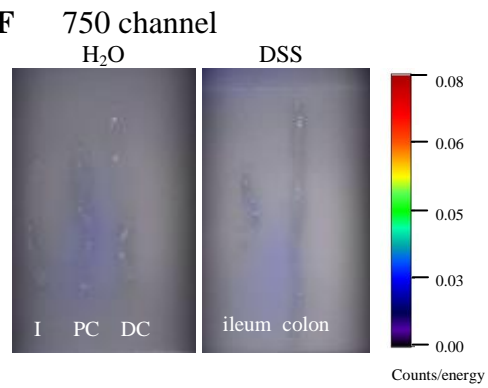**Supplemental Figure 1.**

**A**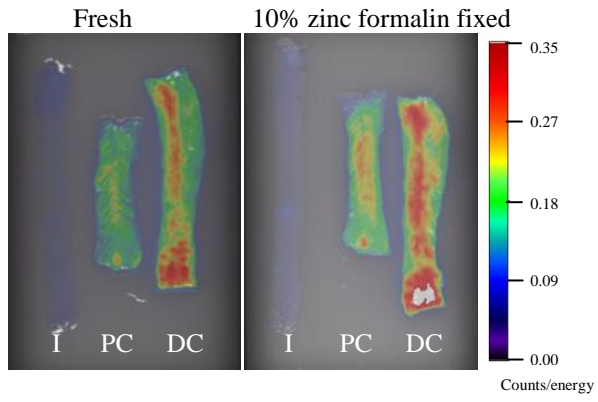**B**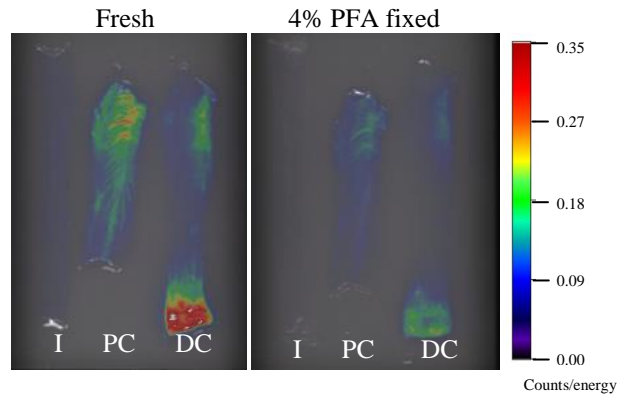**Supplemental Figure 2.**

Supplement: NIHMS723131-supplement-supplement_1.pdf [file NIHMS723131-supplement-supplement_1.pdf]
